# Supplementary material for: Biocompatible, injectable and self-healable MOF-based anti-freezing eutectogels for higher encapsulation and sustained release of the anticancer drug curcumin
Source: Royal Society of Chemistry journal article supplement (doi:10.1039/d3pm00088e), 2024-01-01
Supplement: d3pm00088e1.pdf [file d3pm00088e1.pdf]

## Biocompatible, Injectable and Self-healable MOF-Based Anti-freezing Eutectogel for Higher Encapsulation and Sustained Release of Anticancer Drug Curcumin

Nildhara Parsana<sup>a</sup>, Hiral Ukani<sup>a</sup>, Dharmveer Singh Chauhan<sup>a</sup>, Omar El Seoud<sup>b</sup>, Sanjay Mehra<sup>c</sup>,  
Arvind Kumar<sup>c</sup>, Naina Raje<sup>d</sup>, Naved Malek<sup>a,b\*</sup>

<sup>a</sup>Ionic Liquids Research Laboratory, Department of Chemistry, Sardar Vallabhbhai National Institute of Technology, Surat-395007, Gujarat, India

<sup>b</sup>Institute of Chemistry, University of São Paulo, 05508-000 São Paulo, SP, Brazil

<sup>c</sup>Salt and Marine Chemicals Division, CSIR-Central Salt and Marine Chemicals Research

<sup>d</sup>Analytical Chemistry Division, B.A.R.C., Mumbai – 400 085, INDIA

**Table S1:** Effect of different composition on eutectogel formation.

| DES (1 ml)        | MOF % (w/v)            | Suspension                     | SA (w/v) | Gel         |
|-------------------|------------------------|--------------------------------|----------|-------------|
| CG DES,<br>CF DES | 0.2                    | Evenly distributed particles   | –        | –           |
|                   | 0.4                    | Evenly distributed particles   | –        | –           |
|                   | 0.6                    | Evenly distributed particles   | –        | –           |
|                   | 0.8                    | Evenly distributed particles   | –        | –           |
|                   | 1.0                    | Evenly distributed particles   | 1 %      | Viscous sol |
|                   |                        |                                | 2 %      | Loose gel   |
|                   |                        |                                | 3 %      | Gel         |
|                   | 1.2                    | Particles began to settle down | –        | –           |
| Beyond 1.2        | Particles settled down | –                              | –        |             |

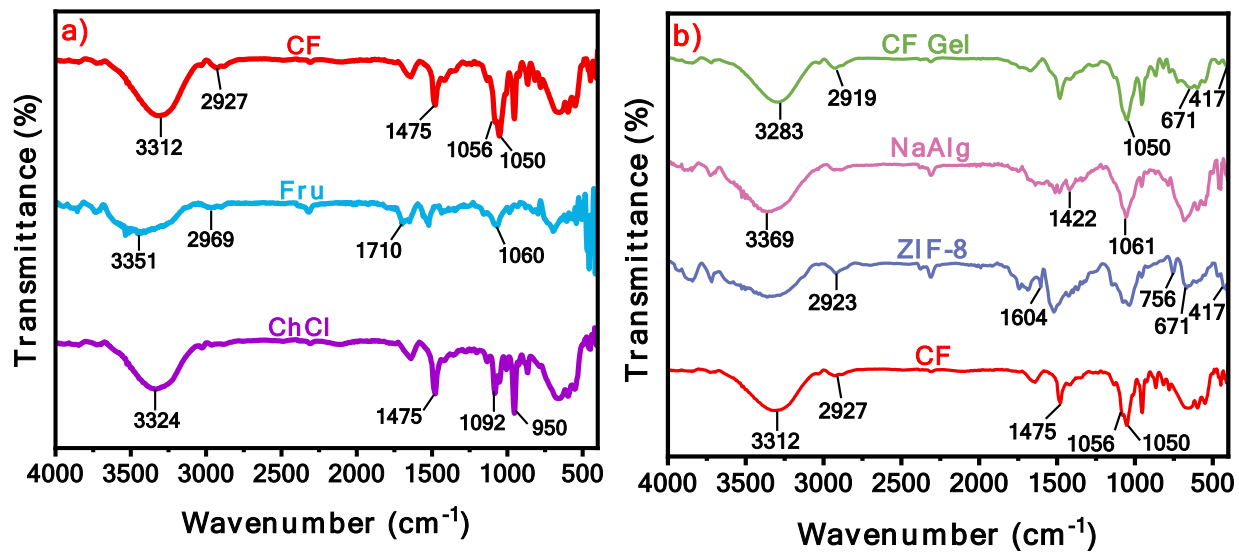

**Figure S1:** FT-IR spectra of a) ChCl, Fru and, CF; b) CF, SA, ZIF-8, CF Gel.

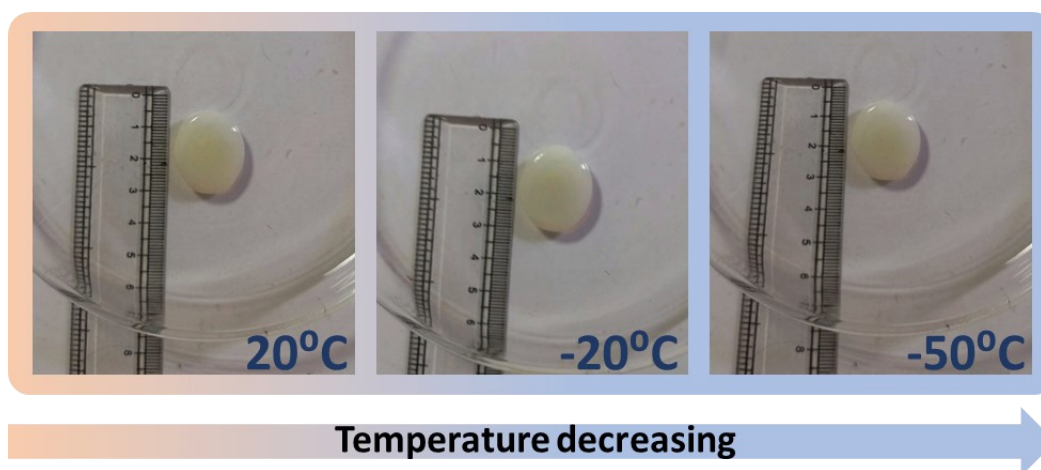

**Figure S2:** Digital photographs of representative eutectogel at different temperature (20°C, -20°C, and -50°C).

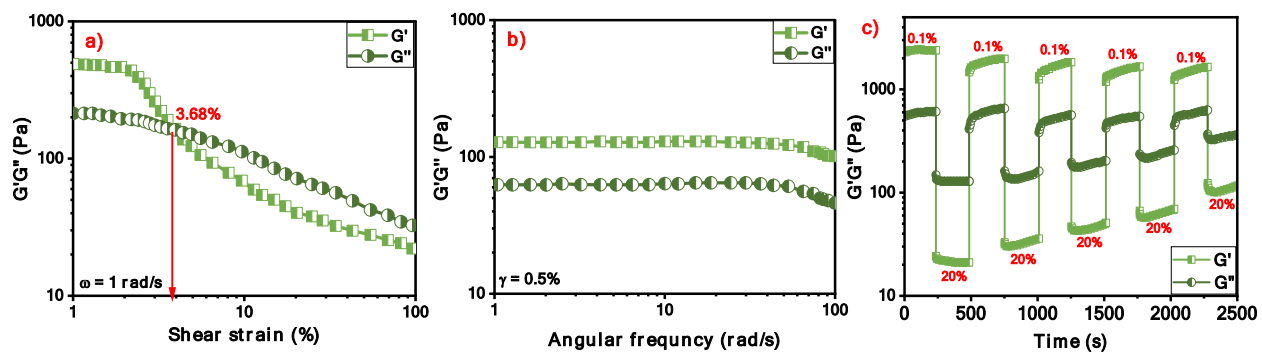

**Figure S3:** a) Strain sweep measurement (CF Gel); b) Frequency sweep measurement (CF gel); c) Thixotropic behavior (CF gel).

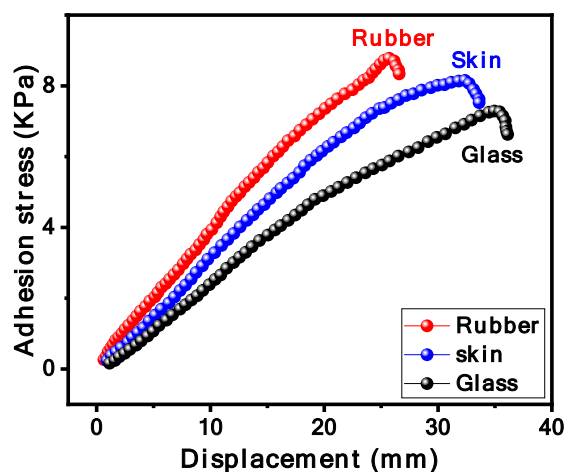

**Figure S4:** Shear stress-displacement profiles of representative eutectogel on different substrates.

**Table S2:** Hemolysis (%) level of CG and CF gel at range of increasing concentration. (Place in ESI)

| Gel    | Concentration (mg/mL) | Hemolysis (%) $\pm$ 0.05 |
|--------|-----------------------|--------------------------|
| CG Gel | 10                    | 0.98                     |
|        | 20                    | 1.02                     |
|        | 30                    | 1.80                     |
|        | 40                    | 1.50                     |
|        | 50                    | 1.70                     |
| CF Gel | 10                    | 0.92                     |

|  |    |      |
|--|----|------|
|  | 20 | 1.34 |
|  | 30 | 1.41 |
|  | 40 | 1.30 |
|  | 50 | 1.60 |

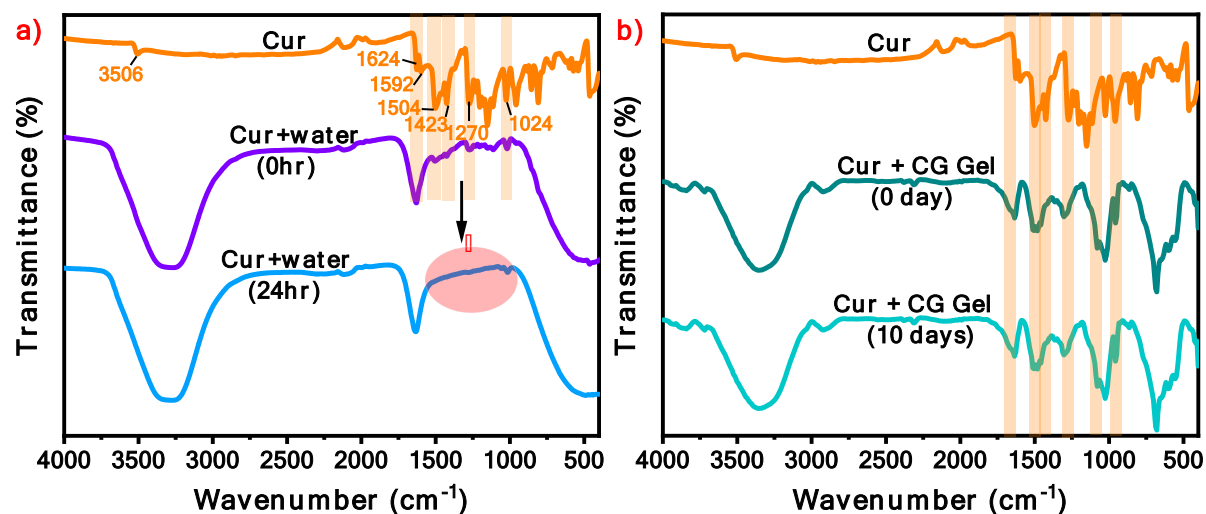

**Figure S5:** Comparative FTIR spectra of **a)** Cur, cur in water (0hr) and cur in water (24hr), **b)** Cur, cur loaded CG gel (0 day) and cur loaded CG gel (10 days).

**Table S3:** Comparative encapsulation efficiency and degradation of curcumin in our studied eutectogels with other systems reported in the literature.

| System                             | Curcumin encapsulation  | Stability<br>(With time) | Reference    |
|------------------------------------|-------------------------|--------------------------|--------------|
| CG Gel                             | 45.60 mg/g              | 30 days                  | Present work |
| CF Gel                             | 42.34 mg/g              | 30 days                  | Present work |
| (TBAC: DA)                         | 5.9 ( $\pm 0.8$ ) mg/ml | 15 days                  | 1            |
| Choline chloride:sorbitol<br>(1:1) | 1.29 mg/ml              | NA                       | 2            |
| Choline chloride:Fructose          | 3.11 mg/ml              | NA                       | 2            |

|                                             |                   |                                                     |    |
|---------------------------------------------|-------------------|-----------------------------------------------------|----|
| <b>(1:1)</b>                                |                   |                                                     |    |
| <b>Choline chloride:glucose<br/>(1:1)</b>   | 2.90 mg/ml        | NA                                                  | 2  |
| <b>Choline chloride:sucrose<br/>(1:1)</b>   | 0.27 mg/ml        | NA                                                  | 2  |
| <b>Choline chloride:maltose<br/>(1:1)</b>   | 1.17 mg/ml        | NA                                                  | 2  |
| <b>Choline chloride: glycerol<br/>(1:1)</b> | 7.15 mg/ml        | NA                                                  | 2  |
| <b>CUR-ME-G</b>                             | 14.9 mg/g         | NA                                                  | 3  |
| <b>Car/Alg beads</b>                        | 10.16 ± 0.15 mg/g | NA                                                  | 4  |
| <b>Cur-loaded SA hydrogel<br/>beads.</b>    | 7.25 ± 3.16 mg/g  | NA                                                  | 5  |
| <b>CUR/CS-Alg-g-PF127</b>                   | 5mg/ml            | NA                                                  | 6  |
| <b>Alginate aldehyde–gelatin</b>            | 72%*              | NA                                                  | 7  |
| <b>Alg-Ccm conjugare</b>                    | NA                | 6h                                                  | 8  |
| <b>CG/Alg nanoparticles</b>                 | 69%*              | NA                                                  | 9  |
| <b>ZIF-8@PCNF composite<br/>hydrogel</b>    | 82%*              | NA                                                  | 10 |
| <b>CCM-ZIF-8-GA</b>                         | 90%*              | NA                                                  | 11 |
| <b>CCMZIF 0.008</b>                         | 87.1%*            | 4.2 time higher<br>stable then only<br>CCM (4 hour) | 12 |
| <b>Cur-ZIF8-HA</b>                          | 96.11%*           | 48 hours                                            | 13 |
| <b>ZIF@CCM</b>                              | 82.76%*           | NA                                                  | 14 |

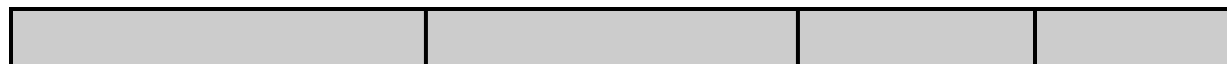

\* No actual loading values are provided in the literature.

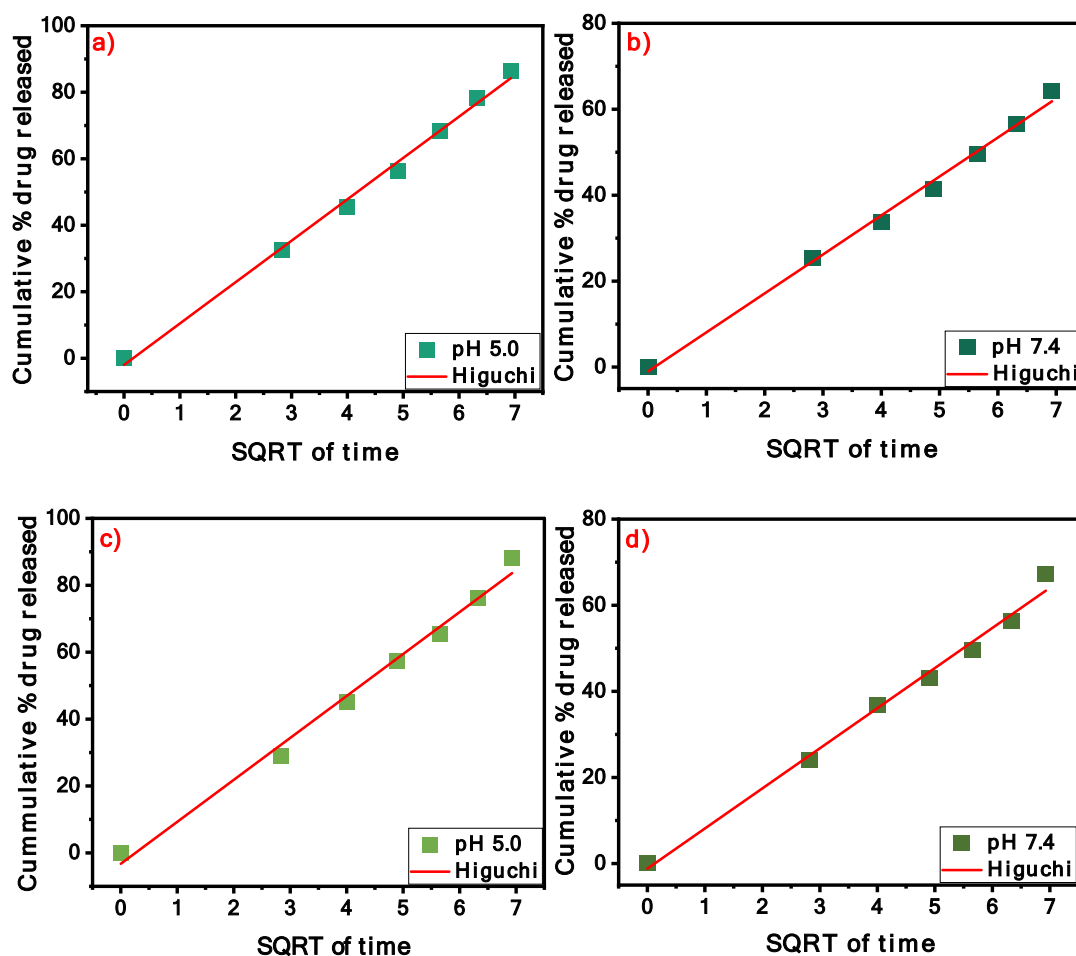

**Figure S6:** Linear fitting of curcumin release data for **a)** CG gel at pH 5.0, **b)** CG gel at pH 7.4, **c)** CF gel at pH 5.0 and, **d)** CF gel at pH 7.4.

**Table S4:** Kinetic model fitting in curcumin loaded CG and CF Gel at pH 7.4 and pH 5.0.

| Kinetic model      | CG Gel (pH 7.4)                          | CG Gel (pH 5.0)                          | CF Gel (pH 7.4)                          | CF Gel (pH 5.0)                         |
|--------------------|------------------------------------------|------------------------------------------|------------------------------------------|-----------------------------------------|
| <b>Zero-order</b>  | $y = 1.2119x + 9.6207$<br>$R^2 = 0.9382$ | $y = 1.6668x + 12.482$<br>$R^2 = 0.9432$ | $y = 1.2441x + 9.7414$<br>$R^2 = 0.9344$ | $y = 1.6932x + 11.001$<br>$R^2 = 0.954$ |
| <b>First-order</b> | $y = -0.0086x +$                         | $y = -0.0171x +$                         | $y = -0.0091x +$                         | $y = -0.0176x +$                        |

|                         |                                          |                                          |                                          |                                          |
|-------------------------|------------------------------------------|------------------------------------------|------------------------------------------|------------------------------------------|
|                         | 1.9722<br>$R^2 = 0.9852$                 | 2.0061<br>$R^2 = 0.983$                  | 1.9737<br>$R^2 = 0.9755$                 | 2.0225<br>$R^2 = 0.9597$                 |
| <b>Higuchi</b>          | $y = 9.0707x - 0.9943$<br>$R^2 = 0.9946$ | $y = 12.448x - 1.9965$<br>$R^2 = 0.9954$ | $y = 9.3158x - 1.1727$<br>$R^2 = 0.9914$ | $y = 12.542x - 3.2561$<br>$R^2 = 0.9905$ |
| <b>Hixcon-Crowell</b>   | $y = 0.0259x + 0.1229$<br>$R^2 = 0.9757$ | $y = 0.0444x + 0.0944$<br>$R^2 = 0.9913$ | $y = 0.0269x + 0.1212$<br>$R^2 = 0.9697$ | $y = 0.0454x + 0.0549$<br>$R^2 = 0.9846$ |
| <b>Korsmeyer-Peppas</b> | $y = 36.057x - 3.9235$<br>$R^2 = 0.9477$ | $y = 49.418x - 5.9402$<br>$R^2 = 0.946$  | $y = 37.064x - 4.2199$<br>$R^2 = 0.9464$ | $y = 49.581x - 6.9811$<br>$R^2 = 0.9334$ |

**Table S5:** Antimicrobial activities of DES and their respective gel with and without curcumin.

| <b>System</b>    | <b>B. subtilis</b> | <b>E. coli</b>  | <b>S. aureus</b> | <b>S. typhi</b> |
|------------------|--------------------|-----------------|------------------|-----------------|
| <b>CG system</b> | $6.5 \pm 0.13$     | $6.9 \pm 0.13$  | $6.6 \pm 0.11$   | $6.9 \pm 0.14$  |
|                  | $10.5 \pm 0.21$    | $10.5 \pm 0.22$ | $12 \pm 0.24$    | $12.5 \pm 0.23$ |
|                  | $24 \pm 0.15$      | $23.5 \pm 0.15$ | $25.5 \pm 0.3$   | $25 \pm 0.48$   |
| <b>CF system</b> | $6.5 \pm 0.13$     | $7 \pm 0.14$    | $6.5 \pm 0.13$   | $6.8 \pm 0.12$  |
|                  | $12.1 \pm 0.24$    | $11.5 \pm 0.23$ | $11.5 \pm 0.23$  | $11 \pm 0.24$   |
|                  | $24 \pm 0.48$      | $23.1 \pm 0.19$ | $22.5 \pm 0.35$  | $22 \pm 0.45$   |

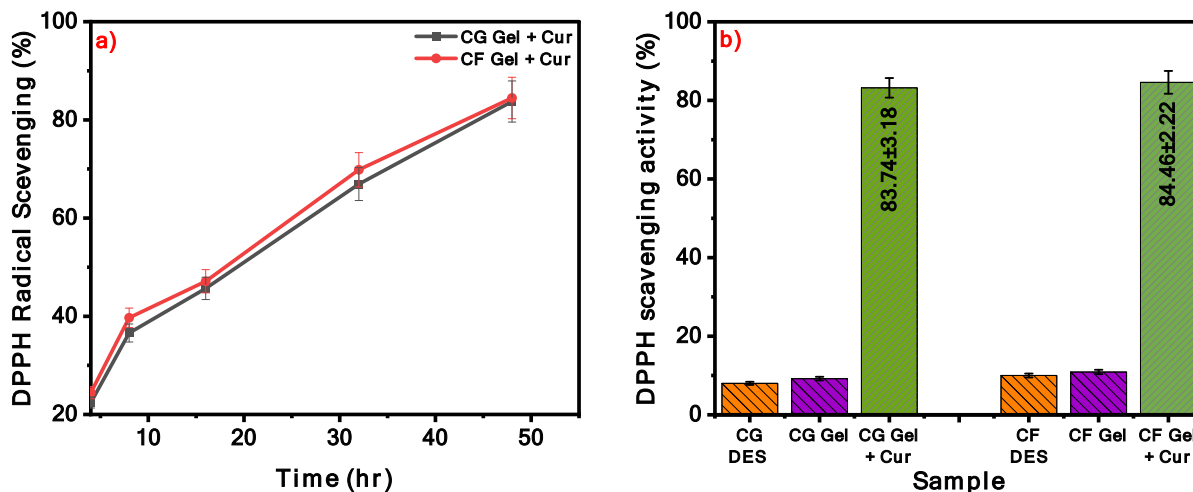

**Figure S7: a)** Time dependent DPPH radical scavenging (%) activities of Cur loaded gels (CG gel, CF gel) and; **b)** DPPH radical scavenging (%) activities of DESs and their respective gel with and without drug.

## References

- 1 D. Dhingra, M. Bisht, B. Bhawna and S. Pandey, *J. Mol. Liq.*, 2021, **339**, 117037.
- 2 T. Jeliński, M. Przybyłek and P. Cysewski, *Pharm. Res.*, 2019, **36**, 116.
- 3 Y.-H. Li, Y.-S. Wang, J.-S. Zhao, Z.-Y. Li and H.-H. Chen, *Int. J. Biol. Macromol.*, 2021, **182**, 1863–1873.
- 4 K. S. Postolović, M. D. Antonijević, B. Ljujić, M. Miletić Kovačević, M. Gazdić Janković and Z. D. Stanić, *Molecules*, 2022, **27**, 4045.
- 5 W. Xu, L. Huang, W. Jin, P. Ge, B. R. Shah, D. Zhu and J. Jing, *Int. J. Biol. Macromol.*, 2019, **134**, 210–215.
- 6 S. A. Shah, M. Sohail, S. A. Khan and M. Kousar, *Mater. Sci. Eng. C*, 2021, **126**, 112169.
- 7 A. Karim, A. Rehman, J. Feng, A. Noreen, E. Assadpour, M. S. Kharazmi, Z. Lianfu and S. M. Jafari, *Adv. Colloid Interface Sci.*, 2022, **307**, 102744.
- 8 S. Dey and K. Sreenivasan, *Carbohydr. Polym.*, 2014, **99**, 499–507.



- 9 P. R. Sarika and N. R. James, *Carbohydr. Polym.*, 2016, **148**, 354–361.
- 10 Y. Liu, Y. Huo, M. Li, C. Qin and H. Liu, *Cellulose*, 2022, **29**, 379–393.
- 11 S. F. Khalilian, M. Tohidi and B. Rastegari, *ACS Omega*, 2023, **8**, 3245–3257.
- 12 S. Jung, S. Chang, N.-E. Kim, S.-O. Choi, Y.-J. Song, Y. Yuan and J. Kim, *ACS Appl. Nano Mater.*, 2022, **5**, 13671–13679.
- 13 X. Wang, G. Fan, Q. Guan, L. Zhao, F. Sun, H. Yang, J. Zhao, J. Zhang, H. Wang, W. Zhang and J. Ma, *ACS Appl. Nano Mater.*, 2022, **5**, 16094–16107.
- 14 X. Meng, J. Guan, S. Lai, L. Fang and J. Su, *RSC Adv.*, 2022, **12**, 10005–10013.
